# Supplementary material
Source: Springer Nature journal article supplement (https://www.springermedizin.de/resource/supplementary/12902_2014_276_MOESM2_ESM.pdf/9515932)

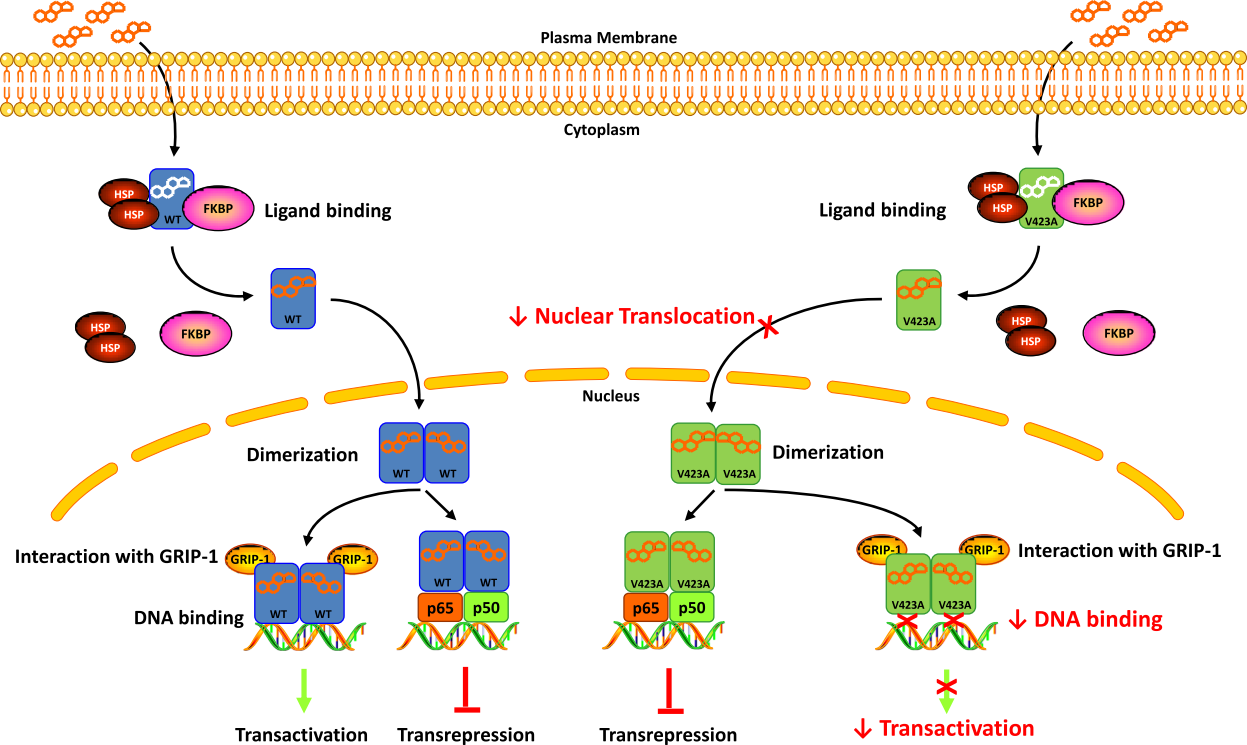

Supplement: MOESM2 [file 9515932]
